# Supplementary material
Source: publisher figshare collection journal article supplement (https://geolsoc.figshare.com/ndownloader/files/5422445)
Supplement: Supplementary file 1 [file 5422445]

Table 1 (supplementary material).  Feldspar LA-ICP-MS Pb isotope data,,,,,,,,,,,,,,
Spot#,Type,206Pb/204Pb,�2?,207Pb/204Pb,�2?,208Pb/204Pb,�2?,,,,,,,
,,,,,,,,,,,,,,
Napier Complex,,,,,,,,,,,,,,
"Sample 49415, Mount Todd (-67.3, 50.8)",,,,,,,,,,,,,,
"kfs layered orthogneiss, 2800",,,,,,,,,,,,,,
f 7.1,kfs,15.081,0.021,15.593,0.022,33.953,0.049,,,,,,,
f 5.1a,kfs,15.059,0.021,15.577,0.022,33.916,0.049,,,,,,,
f 10.1,kfs,15.050,0.022,15.533,0.023,33.831,0.051,,,,,,,
f 9.1b,kfs,15.168,0.024,15.625,0.025,34.030,0.054,,,,,,,
f 1.1,kfs,15.302,0.033,15.669,0.034,34.115,0.074,,,,,,,
f 5.1b,kfs,15.091,0.034,15.569,0.035,33.922,0.078,,,,,,,
f 9.1a,kfs,15.099,0.034,15.598,0.036,34.006,0.079,,,,,,,
plag 1.1,pl,15.601,0.111,15.754,0.112,34.333,0.247,,,,,,,
plag 5.1,pl,15.112,0.117,15.605,0.122,34.000,0.269,,,,,,,
plag 9.1,pl,15.229,0.134,15.652,0.138,34.164,0.305,,,,,,,
"Sample DN57, Tonagh Island (-67.1, 50.3)",,,,,,,,,,,,,,
"opx orthogneiss, 2480",,,,,,,,,,,,,,
f 5.1b,kfs,15.848,0.024,15.986,0.024,35.132,0.054,,,,,,,
f y,kfs,15.750,0.033,15.939,0.034,35.057,0.075,,,,,,,
f x,kfs,15.746,0.025,15.945,0.025,35.054,0.056,,,,,,,
f 6.1,kfs,15.751,0.026,15.950,0.026,35.061,0.058,,,,,,,
f 5.1a,kfs,15.896,0.027,15.974,0.027,35.095,0.060,,,,,,,
"Sample 49462, Fyfe Hills (-67.4, 49.5)",,,,,,,,,,,,,,
"px granulite orthogneiss, 2800",,,,,,,,,,,,,,
f 2.1b,kfs,16.693,0.024,16.543,0.024,36.526,0.054,,,,,,,
f 1.1b,kfs,16.612,0.027,16.515,0.027,36.251,0.060,,,,,,,
f 1.1a,kfs,16.891,0.027,16.504,0.026,37.525,0.061,,,,,,,
f 2.1a,kfs,16.733,0.028,16.485,0.026,37.092,0.061,,,,,,,
f 3.1,kfs,16.505,0.033,16.465,0.033,35.907,0.071,,,,,,,
"Sample DN51A, Mount Pardoe (-67.133, 50.166)",,,,,,,,,,,,,,
spp metapelitic paragneiss 2500 (m),,,,,,,,,,,,,,
f2,kfs,18.822,0.038,17.378,0.033,36.487,0.036,,,,,,,
f3,kfs,18.895,0.054,17.417,0.051,36.512,0.054,,,,,,,
f5,kfs,18.904,0.058,17.498,0.054,36.731,0.057,,,,,,,
f4,kfs,18.787,0.061,17.382,0.056,36.482,0.060,,,,,,,
"Sample 49393, Zircon Point (-67.5, 49.5)",,,,,,,,,,,,,,
"grt sill paragneiss, 2500 (m)",,,,,,,,,,,,,,
f4,kfs,21.494,0.123,17.591,0.102,62.028,0.181,,,,,,,
f3,kfs,22.242,0.148,17.891,0.121,67.799,0.244,,,,,,,
f1,kfs,21.612,0.157,17.909,0.130,59.501,0.230,,,,,,,
f2,kfs,21.962,0.163,17.841,0.133,64.996,0.246,,,,,,,
f5,kfs,21.092,0.166,17.576,0.139,58.824,0.236,,,,,,,
f6,kfs,22.160,0.174,17.837,0.140,70.372,0.287,,,,,,,
"Sample 49606 (-67.35, 49.40), McIntire Island",,,,,,,,,,,,,,
"grt sill paragneiss, 2500 (m)",,,,,,,,,,,,,,
f 6.1,kfs,34.588,0.149,21.070,0.090,49.337,0.215,,,,,,,
f 7.1a,kfs,30.808,0.145,20.506,0.098,46.424,0.223,,,,,,,
f 7.1b,kfs,31.357,0.153,20.768,0.102,46.890,0.232,,,,,,,
f 4.1b,kfs,31.435,0.185,20.662,0.122,45.535,0.273,,,,,,,
f 4.1a,kfs,30.503,0.189,20.429,0.127,45.102,0.284,,,,,,,
f 2.1,kfs,32.877,0.210,20.875,0.134,45.538,0.295,,,,,,,
"Sample DN28, Tonagh Island (-67.1, 50.3)",,,,,,,,,,,,,,
nebulitic leucosome in orthogneiss 2480,,,,,,,,,,,,,,
f5,kfs,17.087,0.042,16.774,0.041,36.386,0.045,,,,,,,
f3,kfs,17.016,0.052,16.739,0.052,36.288,0.056,,,,,,,
f4,kfs,17.004,0.056,16.715,0.055,36.236,0.061,,,,,,,
f1,kfs,16.990,0.115,16.745,0.114,36.286,0.124,,,,,,,
f2,kfs,17.151,0.150,16.855,0.149,36.566,0.163,,,,,,,
,,,,,,,,,,,,,,
"Rayner Complex, Beaver terrane (North Prince Charles Mountains)",,,,,,,,,,,,,,
"Sample IF89326, Amery Peaks Massif (-70.667, 67.033)",,,,,,,,,,,,,,
"late opx felsic orthogneiss body, 980",,,,,,,,,,,,,,
f 7.1,kfs,17.808,0.017,15.765,0.015,38.000,0.037,,,,,,,
f b,kfs,17.892,0.037,15.828,0.033,38.567,0.080,,,,,,,
f d,kfs,17.834,0.040,15.789,0.035,38.076,0.085,,,,,,,
f c,kfs,17.777,0.057,15.723,0.051,38.193,0.126,,,,,,,
f a,kfs,17.826,0.034,15.766,0.030,38.271,0.080,,,,,,,
"Sample IF89266, Saxton Ridge (-70.633, 66.900)",,,,,,,,,,,,,,
"felsic orthogneiss, 990",,,,,,,,,,,,,,
f 3.1a,kfs,17.787,0.020,15.724,0.018,37.795,0.045,,,,,,,
f 3.1b,kfs,17.786,0.020,15.740,0.018,37.705,0.043,,,,,,,
f 1.1,kfs,17.800,0.026,15.735,0.023,37.791,0.057,,,,,,,
f 4.1,kfs,17.813,0.030,15.757,0.027,37.843,0.066,,,,,,,
plag 2.1,pl,17.838,0.060,15.748,0.054,37.991,0.134,,,,,,,
plag 3.1,pl,17.785,0.061,15.723,0.053,37.816,0.133,,,,,,,
plag 1.1,pl,17.956,0.064,15.871,0.057,38.041,0.138,,,,,,,
f 2.1,kfs,17.834,0.035,15.747,0.030,37.969,0.077,,,,,,,
"Sample IF8913, Mount Bunt (-70.80, 66.25)",,,,,,,,,,,,,,
"opx pl orthogneiss, 990",,,,,,,,,,,,,,
plag 5.1,pl,18.050,0.171,15.913,0.154,37.724,0.368,,,,,,,
plag 1.1,pl,17.749,0.175,15.743,0.157,37.233,0.376,,,,,,,
plag 3.1,pl,18.054,0.176,15.934,0.156,37.792,0.373,,,,,,,
"Sample IF89122, Mount Bunt (-70.750, -66.417)",,,,,,,,,,,,,,
"opx leucocratic orthogneiss, 990",,,,,,,,,,,,,,
f 1.1,kfs,17.983,0.016,15.789,0.014,37.851,0.035,,,,,,,
f 3.1,kfs,18.110,0.024,15.777,0.020,38.383,0.050,,,,,,,
f 4.1,kfs,18.030,0.024,15.767,0.021,38.261,0.052,,,,,,,
f 2.1,kfs,17.996,0.024,15.773,0.021,38.049,0.052,,,,,,,
plag 5.1,pl,18.141,0.115,15.833,0.099,38.317,0.248,,,,,,,
plag 4.1,pl,18.081,0.154,15.785,0.135,38.481,0.333,,,,,,,
"Sample IF89334A, Amery Peak (-70.60, 67.25)",,,,,,,,,,,,,,
"opx orthogneiss, 980",,,,,,,,,,,,,,
f 3.1b,kfs,18.122,0.018,15.839,0.016,37.980,0.039,,,,,,,
f 3.1a,kfs,18.120,0.022,15.832,0.019,37.980,0.046,,,,,,,
f 2.1,kfs,18.107,0.023,15.822,0.020,37.938,0.050,,,,,,,
f 4.1,kfs,18.056,0.041,15.777,0.037,37.838,0.088,,,,,,,
"Sample IF8988, Mount Trott (-70.700, 66.367)",,,,,,,,,,,,,,
"opx banded orthogneiss, 990",,,,,,,,,,,,,,
f 2.1,kfs,20.869,0.020,16.272,0.016,37.893,0.037,,,,,,,
f 1.1,kfs,20.848,0.022,16.240,0.017,37.800,0.040,,,,,,,
f 5.1,kfs,20.847,0.029,16.278,0.022,38.003,0.052,,,,,,,
f 6.1,kfs,20.839,0.031,16.298,0.024,38.106,0.057,,,,,,,
f 4.1,kfs,20.906,0.031,16.278,0.024,37.940,0.057,,,,,,,
plag 2.1,pl,20.862,0.085,16.243,0.067,37.860,0.157,,,,,,,
plag 1.1,pl,21.050,0.090,16.356,0.071,38.116,0.166,,,,,,,
plag 4.1,pl,20.887,0.094,16.338,0.075,38.071,0.175,,,,,,,
,,,,,,,,,,,,,,
Prydz Belt,,,,,,,,,,,,,,
"Sample SH0698, , Steinnes Peninsula (-69.348, 76.588)",,,,,,,,,,,,,,
"""basement"" opx orthogneiss, 515",,,,,,,,,,,,,,
f 3.1a,kfs,18.616,0.015,15.787,0.013,38.193,0.032,,,,,,,
f 1.1,kfs,18.653,0.017,15.822,0.015,38.272,0.036,,,,,,,
f 2.1,kfs,18.588,0.017,15.764,0.015,38.134,0.037,,,,,,,
f 3.1b,kfs,18.622,0.018,15.791,0.015,38.203,0.037,,,,,,,
f 5.1,kfs,18.685,0.019,15.816,0.016,38.301,0.039,,,,,,,
f 5.1,kfs,18.729,0.024,15.872,0.020,38.415,0.050,,,,,,,
plag 5.1,pl,18.834,0.102,15.939,0.088,38.599,0.213,,,,,,,
plag 3.1,pl,18.906,0.126,15.931,0.106,38.571,0.264,,,,,,,
"Sample IF89176, Hovde Island (-69.250, 76.867)",,,,,,,,,,,,,,
"""basement"" opx orthogneiss, 515",,,,,,,,,,,,,,
plag 6.1,pl,17.507,0.112,15.760,0.102,37.535,0.245,,,,,,,
plag 2.1,pl,17.244,0.124,15.533,0.113,36.989,0.271,,,,,,,
plag 4.1,pl,17.227,0.143,15.511,0.128,36.965,0.312,,,,,,,
plag 5.1,pl,17.449,0.149,15.687,0.134,37.407,0.324,,,,,,,
plag 3.1,pl,17.490,0.151,15.731,0.135,37.494,0.328,,,,,,,
"Sample SH06115, east Brattstrand Bluffs (-69.177, 77.339)",,,,,,,,,,,,,,
"""LG1 grt leucogneiss"" in migmatitic pelite, 515",,,,,,,,,,,,,,
f3,kfs,17.567,0.031,15.662,0.028,37.747,0.034,,,,,,,
f1,kfs,17.588,0.031,15.683,0.028,37.781,0.034,,,,,,,
f4,kfs,17.577,0.031,15.676,0.028,37.783,0.035,,,,,,,
f2,kfs,17.561,0.036,15.660,0.032,37.729,0.039,,,,,,,
f5p,pl,17.543,0.074,15.637,0.067,37.728,0.081,,,,,,,
"Sample SH0693, west Brattstrand Bluffs (-69.206, 77.021)",,,,,,,,,,,,,,
"""LG1 leucogneiss"" in migmatitic pelite, 515",,,,,,,,,,,,,,
f 5.1b,kfs,17.596,0.014,15.689,0.013,37.822,0.031,,,,,,,
f 5.1a,kfs,17.553,0.022,15.647,0.020,37.738,0.048,,,,,,,
f 4.1,kfs,17.576,0.036,15.665,0.033,37.799,0.080,,,,,,,
plag 7.1,pl,17.513,0.062,15.621,0.056,37.678,0.136,,,,,,,
plag 4.1,pl,17.550,0.092,15.657,0.083,37.747,0.203,,,,,,,
"Sample SH0648, west Brattstrand Bluffs (-69.206, 77.306)",,,,,,,,,,,,,,
"grt cd paragneiss, 515",,,,,,,,,,,,,,
f1,kfs,17.454,0.061,15.596,0.055,37.478,0.066,,,,,,,
f4,kfs,17.559,0.084,15.678,0.075,37.696,0.092,,,,,,,
f5,kfs,17.417,0.093,15.556,0.083,37.408,0.102,,,,,,,
f2,kfs,17.429,0.099,15.567,0.087,37.438,0.108,,,,,,,
f3,kfs,17.597,0.109,15.710,0.098,37.815,0.120,,,,,,,
"Sample IF88242, Amanda Bay (-69.283, 76.833)",,,,,,,,,,,,,,
"late kfs megacrystic granite, 515",,,,,,,,,,,,,,
f 3.1a,kfs,17.579,0.016,15.644,0.015,38.184,0.036,,,,,,,
f 2.1,kfs,17.595,0.017,15.650,0.015,38.210,0.038,,,,,,,
f 6.1,kfs,17.599,0.018,15.658,0.016,38.213,0.040,,,,,,,
f 1.1,kfs,17.573,0.020,15.633,0.018,38.163,0.044,,,,,,,
f 3.1b,kfs,17.618,0.031,15.663,0.028,38.261,0.069,,,,,,,
plag 1.1,pl,17.584,0.074,15.658,0.066,38.220,0.163,,,,,,,
plag 6.1,pl,17.624,0.080,15.683,0.072,38.287,0.177,,,,,,,
plag 2.1,pl,17.461,0.073,15.527,0.066,37.915,0.162,,,,,,,
"Sample NRL147, Landing Bluff (-74.35, 66.64)",,,,,,,,,,,,,,
"late ms bt granite, 500",,,,,,,,,,,,,,
f4_1,kfs,17.824,0.063,15.772,0.056,38.721,0.139,,,,,,,
f4_2,kfs,17.777,0.060,15.739,0.054,38.546,0.133,,,,,,,
f5_1,kfs,17.776,0.054,15.733,0.049,38.559,0.120,,,,,,,
"Sample 74282666, Austin nunatak, Grove Mtns. (-74.9, 74.9)",,,,,,,,,,,,,,
"leucogneiss, 500",,,,,,,,,,,,,,
p4,pl,18.307,0.093,15.753,0.080,38.441,0.200,,,,,,,
p5_1,pl,18.420,0.096,15.795,0.083,38.592,0.205,,,,,,,
p5_2,pl,18.341,0.089,15.796,0.077,38.458,0.189,,,,,,,
p3_1,pl,18.474,0.089,15.742,0.075,38.839,0.192,,,,,,,
p3_2,pl,18.288,0.071,15.648,0.061,38.506,0.153,,,,,,,
"Sample 72280876, Mt. Harding, Grove Mtns. (-72.85, 75.09)",,,,,,,,,,,,,,
"charnockite, 504",,,,,,,,,,,,,,
f4,kfs,17.975,0.027,15.710,0.024,38.236,0.059,,,,,,,
f5,kfs,17.975,0.014,15.716,0.012,38.209,0.031,,,,,,,
f6,kfs,18.002,0.015,15.743,0.013,38.275,0.033,,,,,,,
f1,kfs,17.990,0.019,15.731,0.017,38.249,0.042,,,,,,,
f2,kfs,17.972,0.013,15.716,0.012,38.204,0.029,,,,,,,
"Sample 1131v, Mirnyi Station (-66.553, 93.009)",,,,,,,,,,,,,,
"mafic orthogneiss, 1000",,,,,,,,,,,,,,
p1,pl,17.634,0.064,15.650,0.057,40.767,0.152,,,,,,,
p2,pl,17.718,0.066,15.693,0.059,41.017,0.156,,,,,,,
p2 rpt,pl,17.787,0.045,15.652,0.040,41.014,0.106,,,,,,,
pa,pl,17.665,0.060,15.658,0.053,40.830,0.142,,,,,,,
"Sample 45101-1, Mirnyi Station (-66.525, 93.005)",,,,,,,,,,,,,,
"charnockite, 500",,,,,,,,,,,,,,
p3,pl,17.773,0.040,15.678,0.036,38.500,0.089,,,,,,,
f1,kfs,17.732,0.036,15.644,0.032,38.417,0.080,,,,,,,
p2,pl,17.779,0.043,15.660,0.038,38.473,0.095,,,,,,,
f5_1,kfs,17.842,0.040,15.745,0.036,38.651,0.088,,,,,,,
f5_2,kfs,17.684,0.035,15.607,0.031,38.302,0.078,,,,,,,
,,,,,,,,,,,,,,
Rauer Complex,,,,,,,,,,,,,,
"Sample SH88191, Scherbinina Island (-68.833, 77.919)",,,,,,,,,,,,,,
"""tonalitic felsic gneiss"", felsic opx gneiss, 2850",,,,,,,,,,,,,,
f 2.1,kfs,13.629,0.042,14.709,0.046,34.190,0.108,,,,,,,
f 4.1,kfs,13.547,0.052,14.632,0.057,34.014,0.133,,,,,,,
f 5.1b,kfs,13.507,0.053,14.591,0.058,33.889,0.136,,,,,,,
f 5.1a,kfs,13.624,0.058,14.708,0.062,34.186,0.147,,,,,,,
f 6.1,kfs,13.566,0.060,14.642,0.065,34.035,0.153,,,,,,,
plag 5.1,pl,13.700,0.086,14.793,0.093,34.384,0.219,,,,,,,
plag 6.1,pl,13.747,0.094,14.857,0.102,34.504,0.239,,,,,,,
plag 4.1,pl,13.677,0.098,14.776,0.107,34.336,0.250,,,,,,,
"Sample SH06180, Torckler Island (-68.889, 77.853)",,,,,,,,,,,,,,
"""Leucocratic garnet-bearing granitic gneiss"", leucogneiss, 1000",,,,,,,,,,,,,,
feld 3.1,kfs,17.782,0.009,15.773,0.008,38.095,0.021,,,,,,,
feld 5,kfs,17.764,0.010,15.754,0.009,38.057,0.022,,,,,,,
feld 3,kfs,17.727,0.010,15.723,0.009,37.986,0.022,,,,,,,
feld 1,kfs,17.772,0.013,15.761,0.012,38.075,0.029,,,,,,,
feld 6,kfs,17.763,0.013,15.755,0.012,38.047,0.029,,,,,,,
"Sample 65750, Babe Ruth Island (-68.942, 77.938)",,,,,,,,,,,,,,
"""tonalitic felsic orthogneiss"", felsic gneiss, 1050",,,,,,,,,,,,,,
f 3.1,kfs,17.641,0.010,15.721,0.009,37.893,0.022,,,,,,,
f 1.1,kfs,17.679,0.012,15.756,0.010,37.971,0.026,,,,,,,
f 2.1,kfs,17.669,0.012,15.747,0.011,37.951,0.026,,,,,,,
f. 5.1,kfs,17.655,0.013,15.734,0.012,37.917,0.028,,,,,,,
f 6.1,kfs,17.677,0.019,15.755,0.017,37.966,0.043,,,,,,,
plag 5.1,pl,17.625,0.047,15.715,0.042,37.866,0.102,,,,,,,
plag 3.1,pl,17.662,0.047,15.749,0.042,37.948,0.104,,,,,,,
plag 1.1,pl,17.682,0.048,15.762,0.043,37.989,0.105,,,,,,,
plag 2.1,pl,17.643,0.050,15.724,0.044,37.903,0.108,,,,,,,
"Sample SH8878, Varyag Island (-68.842, 77.767)",,,,,,,,,,,,,,
"""tonalitic felsic orthogneiss"", opx felsic gneiss, 1050",,,,,,,,,,,,,,
f3,kfs,18.236,0.036,15.842,0.032,38.978,0.039,,,,,,,
f4,kfs,18.392,0.039,15.983,0.034,39.337,0.042,,,,,,,
f5,kfs,18.353,0.056,15.945,0.049,39.250,0.061,,,,,,,
f6,kfs,18.339,0.058,15.931,0.051,39.207,0.064,,,,,,,
f1,kfs,18.247,0.102,15.834,0.090,38.962,0.110,,,,,,,
f2p,plag,18.070,0.113,15.690,0.098,38.614,0.122,,,,,,,
"Sample SH88236, Sapozhok (-68.886, 77.914)",,,,,,,,,,,,,,
"""composite layered gneiss"", leucosome in layered gneiss, 1000",,,,,,,,,,,,,,
f2,kfs,18.107,0.038,15.711,0.034,38.734,0.042,,,,,,,
f6,kfs,18.267,0.070,15.870,0.062,39.149,0.077,,,,,,,
f4,kfs,18.249,0.087,15.863,0.077,39.104,0.095,,,,,,,
f3p,pl,18.176,0.084,15.777,0.074,38.893,0.092,,,,,,,
f5p,pl,18.225,0.118,15.819,0.104,39.036,0.129,,,,,,,
"Sample SH88270, Flag Island (-68.825, 77.767)",,,,,,,,,,,,,,
"""kfs megacrystic granite gneiss (Hop Island granites)"", kfs grt gneiss, 1000",,,,,,,,,,,,,,
f 7.1,kfs,17.832,0.021,15.771,0.019,39.533,0.048,,,,,,,
f 9.1,kfs,17.831,0.026,15.782,0.024,39.605,0.060,,,,,,,
f 8.1,kfs,17.813,0.030,15.766,0.026,39.560,0.067,,,,,,,
plag 6.1,pl,17.717,0.051,15.661,0.045,39.261,0.116,,,,,,,
plag 10.1,pl,17.829,0.077,15.780,0.070,39.619,0.175,,,,,,,
plag 7.1,pl,17.684,0.085,15.628,0.075,39.177,0.189,,,,,,,
"Sample SH9238, Sapozhok (-68.883, 77.917)",,,,,,,,,,,,,,
"""kfs megacrystic granite gneiss (Hop Island granites)"", kfs gneiss, 1000",,,,,,,,,,,,,,
f2,kfs,18.415,0.044,15.838,0.038,39.200,0.047,,,,,,,
f4,kfs,18.480,0.054,15.887,0.047,39.367,0.058,,,,,,,
f1,kfs,18.661,0.065,15.887,0.048,39.329,0.059,,,,,,,
f6p,pl,18.467,0.065,15.868,0.056,39.358,0.071,,,,,,,
f3p,pl,18.554,0.178,15.930,0.154,39.554,0.194,,,,,,,
,,,,,,,,,,,,,,
Vestfold Complex,,,,,,,,,,,,,,
"Sample VH9227, north Rybnaya Bay (-68.423, 78.350)",,,,,,,,,,,,,,
"""Grace Lake Granodiorite"", granodiorite gneiss, 2500",,,,,,,,,,,,,,
feld 3,kfs,15.621,0.022,16.020,0.023,35.218,0.051,,,,,,,
feld 2,kfs,15.625,0.025,16.019,0.026,35.221,0.057,,,,,,,
feld 1,kfs,15.698,0.025,16.065,0.026,35.543,0.058,,,,,,,
feld 4,kfs,15.637,0.026,16.031,0.027,35.249,0.061,,,,,,,
feld 5,kfs,15.689,0.038,16.079,0.039,35.348,0.086,,,,,,,
"Sample VH93445, east Tryne Fjord (-68.462, 78.401)",,,,,,,,,,,,,,
"""Grace Lake Granodiorite"", granodioritic orthogneiss, 2500",,,,,,,,,,,,,,
f5,kfs,14.825,0.130,15.300,0.134,34.215,0.152,,,,,,,
f1,kfs,14.803,0.213,15.222,0.220,34.125,0.251,,,,,,,
f2p,pl,15.127,0.175,15.468,0.182,34.762,0.205,,,,,,,
f4p,pl,15.130,0.186,15.639,0.194,34.944,0.220,,,,,,,
"Sample VH93456, Murphy Rocks (-68.232, 78.734)",,,,,,,,,,,,,,
"""Grace Lake Granodiorite"", granodiorite gneiss, 2500",,,,,,,,,,,,,,
f2p,pl,15.797,0.062,16.015,0.064,35.761,0.072,,,,,,,
f4p,pl,15.759,0.069,15.984,0.070,35.662,0.080,,,,,,,
f5p,pl,15.571,0.070,15.819,0.071,34.970,0.079,,,,,,,
f1p,pl,15.851,0.071,16.057,0.073,35.917,0.082,,,,,,,
f3p,pl,15.833,0.145,16.045,0.147,35.923,0.167,,,,,,,
"Sample VH9215, north Burch Lake ( -68.451, 78.266)",,,,,,,,,,,,,,
"""Mossel Gneiss"", felsic vein in gneiss, 2500",,,,,,,,,,,,,,
f 1.1c,kfs,15.792,0.031,15.970,0.031,35.279,0.070,,,,,,,
f 6.1,kfs,15.781,0.038,15.930,0.038,35.170,0.086,,,,,,,
f 1.1a,kfs,15.714,0.071,15.887,0.072,35.093,0.161,,,,,,,
f 1.1b,kfs,15.798,0.061,15.969,0.063,35.286,0.141,,,,,,,
plag 6.1,pl,15.613,0.169,15.780,0.172,34.840,0.384,,,,,,,
"Sample VH93134, north Lake Africa ( -68.473, 78.292)",,,,,,,,,,,,,,
"""Crooked Lake Gneiss, Lake Africa Suite"", felsic gneiss, 2500",,,,,,,,,,,,,,
f 3.1,kfls,15.325,0.027,15.653,0.027,34.824,0.061,,,,,,,
f 1.1,kfls,15.657,0.028,15.735,0.028,35.543,0.064,,,,,,,
f 2.1,kfls,15.544,0.034,15.719,0.034,34.895,0.076,,,,,,,
plag 5.1,pl,15.434,0.141,15.747,0.144,35.057,0.326,,,,,,,
"Sample VH9291, east Lake Africa (-68.477, 78.321)",,,,,,,,,,,,,,
"""Crooked Lake Gneiss, Lake Africa Suite"", deformed vein in gneiss, 2500",,,,,,,,,,,,,,
f5,kfs,15.040,0.047,15.386,0.048,34.659,0.055,,,,,,,
f1,kfs,14.956,0.063,15.401,0.066,34.548,0.074,,,,,,,
f4,kfs,14.956,0.087,15.301,0.089,34.450,0.101,,,,,,,
f2,kfs,14.739,0.117,15.151,0.121,34.027,0.137,,,,,,,
f3,kfs,15.010,0.123,15.396,0.124,34.593,0.143,,,,,,,
"Sample VH93533, Lebed Lake (-68.616, 78.213)",,,,,,,,,,,,,,
"""Crooked Lake Gneiss, Watts Hut Suite"", intermediate orthogneiss, 2500",,,,,,,,,,,,,,
f3,kfs,15.082,0.033,15.491,0.035,34.657,0.039,,,,,,,
f4,kfs,15.069,0.069,15.482,0.071,34.635,0.081,,,,,,,
f5,kfs,15.029,0.073,15.432,0.075,34.509,0.085,,,,,,,
f2,kfs,15.130,0.086,15.527,0.089,34.753,0.100,,,,,,,
f1,kfs,15.185,0.164,15.600,0.170,34.886,0.192,,,,,,,
"Sample VH93332, Tryne Crossing (-68.494, 78.313)",,,,,,,,,,,,,,
"""Crooked Lake Gneiss"", intermediate orthogneiss, 2500",,,,,,,,,,,,,,
f 5.1,kfs,15.427,0.033,15.704,0.035,34.965,0.078,,,,,,,
f 4.1,kfs,15.419,0.039,15.676,0.040,34.916,0.090,,,,,,,
f 6.1,kfs,15.325,0.040,15.587,0.041,34.712,0.094,,,,,,,
f 2.1b,kfs,15.355,0.042,15.653,0.042,34.843,0.096,,,,,,,
f 1.1,kfs,15.490,0.061,15.702,0.063,34.986,0.140,,,,,,,
f 2.1a,kfs,15.289,0.043,15.570,0.045,34.676,0.102,,,,,,,
plag 1.1,pl,15.316,0.082,15.560,0.084,34.651,0.190,,,,,,,
plag 5.1,pl,15.295,0.088,15.607,0.091,34.719,0.204,,,,,,,
plag 4.1,pl,15.229,0.089,15.506,0.092,34.516,0.206,,,,,,,
plag 6.1,pl,15.282,0.096,15.591,0.098,34.700,0.221,,,,,,,
plag 2.1,pl,15.334,0.115,15.592,0.118,34.716,0.269,,,,,,,
"Sample VH93218, Ace Lake (-68.478, 78.186)",,,,,,,,,,,,,,
"""Crooked Lake Gneiss"", Intermediate orthogneiss, 2500",,,,,,,,,,,,,,
f2,kfs,15.547,0.043,15.837,0.044,35.148,0.050,,,,,,,
f1,kfs,15.522,0.056,15.803,0.057,35.101,0.064,,,,,,,
f5,kfs,15.575,0.059,15.732,0.060,35.002,0.068,,,,,,,
f3,kfs,15.476,0.074,15.730,0.075,34.941,0.084,,,,,,,
f4p,pl,15.461,0.118,15.683,0.120,34.914,0.135,,,,,,,
,,,,,,,,,,,,,,
Fisher Terrane,,,,,,,,,,,,,,
"Sample 34513, Fisher Massif (-71.43, 67.81)",,,,,,,,,,,,,,
"granodiorite, 1020",,,,,,,,,,,,,,
p1,pl,17.645,0.096,15.505,0.085,36.919,0.203,,,,,,,
p2,pl,17.557,0.111,15.399,0.097,36.709,0.235,,,,,,,
p3,pl,17.722,0.120,15.561,0.108,37.086,0.259,,,,,,,
p4,pl,17.602,0.097,15.551,0.086,37.004,0.206,,,,,,,
p5,pl,17.602,0.119,15.516,0.107,36.965,0.256,,,,,,,
"Sample 34516-1, Fisher Massif (-71.47, 67.72)",,,,,,,,,,,,,,
"metaandesite, 1300",,,,,,,,,,,,,,
p3,pl,16.432,0.077,15.178,0.071,35.833,0.170,,,,,,,
p4,pl,17.166,0.078,15.422,0.068,36.690,0.166,,,,,,,
p5,pl,16.605,0.075,15.349,0.070,36.226,0.167,,,,,,,
p5 rpt,pl,16.660,0.081,15.388,0.075,36.346,0.179,,,,,,,
p2,pl,16.452,0.082,15.206,0.076,35.880,0.181,,,,,,,
,,,,,,,,,,,,,,
Lambert Complex,,,,,,,,,,,,,,
"Sample 9828-337, Manning Glacier (-73.16, 68.24)",,,,,,,,,,,,,,
"granite gneiss, 3519",,,,,,,,,,,,,,
p1,pl,16.172,0.031,15.087,0.030,37.013,0.073,,,,,,,
p2,pl,16.301,0.044,15.106,0.037,37.063,0.093,,,,,,,
p3,pl,16.185,0.032,15.092,0.030,37.039,0.074,,,,,,,
p4,pl,16.205,0.064,15.132,0.060,37.106,0.148,,,,,,,
p5,pl,16.107,0.072,15.039,0.068,36.902,0.168,,,,,,,
"Sample 9828-275, Philpot Bluff (-73.38, 68.31)",,,,,,,,,,,,,,
"granite gneiss,  2123",,,,,,,,,,,,,,
p1,pl,19.371,0.024,15.970,0.020,39.362,0.050,,,,,,,
f1,kfs,19.460,0.019,16.004,0.016,39.630,0.041,,,,,,,
f2,kfs,19.309,0.016,15.959,0.013,39.251,0.033,,,,,,,
f3,kfs,19.332,0.014,15.974,0.011,39.286,0.028,,,,,,,
p3,pl,19.452,0.052,16.029,0.044,39.515,0.108,,,,,,,
"Sample v102, Sulzberger Bluff (-73.05, 68.15)",,,,,,,,,,,,,,
"augen gneiss, 2422",,,,,,,,,,,,,,
p1,pl,20.180,0.029,16.353,0.024,41.741,0.062,,,,,,,
f3,kfs,20.186,0.091,16.285,0.073,41.673,0.190,,,,,,,
f4,kfs,20.149,0.017,16.326,0.014,41.628,0.036,,,,,,,
f5,kfs,20.103,0.015,16.305,0.013,41.535,0.033,,,,,,,
f5 rpt,kfs,20.099,0.015,16.305,0.012,41.537,0.032,,,,,,,
"Sample 48145-2, Mt. Newton (-73.941, 65.189)",,,,,,,,,,,,,,
"ms grt granite, 2100",,,,,,,,,,,,,,
f4,kfs,15.570,0.024,15.458,0.024,34.871,0.055,,,,,,,
f3_1,kfs,15.534,0.013,15.447,0.014,34.853,0.031,,,,,,,
f3_2,kfs,16.130,0.021,15.558,0.020,34.925,0.046,,,,,,,
f4_1,kfs,15.989,0.029,15.518,0.029,34.869,0.066,,,,,,,
f4_2,kfs,15.550,0.011,15.452,0.011,34.860,0.026,,,,,,,
,,,,,,,,,,,,,,
Ruker Complex,,,,,,,,,,,,,,
"Sample 9828-210, McCue Bluff (-73.52, 68.35)",,,,,,,,,,,,,,
"bt hbl granite, 3162",,,,,,,,,,,,,,
f5,kfs,13.037,0.017,14.414,0.018,32.820,0.041,,,,,,,
p5,pl,13.006,0.034,14.400,0.038,32.771,0.087,,,,,,,
f4,kfs,12.997,0.012,14.386,0.013,32.738,0.030,,,,,,,
p4,pl,12.963,0.043,14.374,0.048,32.687,0.111,,,,,,,
f3,kfs,13.052,0.008,14.422,0.009,32.822,0.021,,,,,,,
"Sample 9828-271, Dalton Corner -73.1, 67.1)",,,,,,,,,,,,,,
"granite, 3170",,,,,,,,,,,,,,
f1_1,kfs,16.487,0.019,15.234,0.017,35.998,0.042,,,,,,,
f1_2,kfs,16.505,0.021,15.231,0.019,36.042,0.046,,,,,,,
f6,kfs,16.460,0.027,15.203,0.026,35.917,0.061,,,,,,,
f6 rpt,kfs,16.483,0.020,15.244,0.019,36.020,0.044,,,,,,,
"Sample 9828-190, McCue Bluff (-73.52, 68.35)",,,,,,,,,,,,,,
"bt granite, 3160",,,,,,,,,,,,,,
f2,kfs,14.055,0.037,14.701,0.039,34.873,0.093,,,,,,,
f3,kfs,13.723,0.019,14.650,0.020,34.533,0.050,,,,,,,
f3 rpt,kfs,13.780,0.033,14.638,0.035,34.556,0.084,,,,,,,
f5,kfs,13.609,0.020,14.619,0.021,34.378,0.051,,,,,,,
f5 rpt,kfs,13.583,0.042,14.614,0.045,34.341,0.108,,,,,,,
"Sample 9828-101, Rimmington Bluff (-73.59, 68.37)",,,,,,,,,,,,,,
"bt hbl granite, 3177",,,,,,,,,,,,,,
f4_1,kfs,18.183,0.427,15.494,0.364,41.402,0.998,,,,,,,
f4_2,kfs,18.474,0.246,15.610,0.211,41.494,0.562,,,,,,,
f5_1,kfs,18.014,0.123,15.383,0.105,40.754,0.285,,,,,,,
f5_2,kfs,19.062,0.192,15.856,0.159,42.156,0.424,,,,,,,
f6,kfs,18.330,0.134,15.544,0.116,41.345,0.309,,,,,,,
"Sample 9828-039, Rimmington Bluff (-73.59, 68.37)",,,,,,,,,,,,,,
"granite gneiss, 3174",,,,,,,,,,,,,,
p4,pl,14.973,0.016,14.922,0.016,34.036,0.037,,,,,,,
p3,pl,15.006,0.037,14.958,0.038,34.103,0.086,,,,,,,
p3 rpt,pl,15.003,0.031,14.959,0.032,34.108,0.073,,,,,,,
pa,pl,14.962,0.027,14.918,0.026,34.023,0.061,,,,,,,
pb,pl,14.956,0.038,14.913,0.038,34.011,0.087,,,,,,,
"Sample 48136-1, Mt. Stinear (-73.074, 66.288)",,,,,,,,,,,,,,
"granite gneiss, 2816",,,,,,,,,,,,,,
f1,kfs,17.248,0.027,15.454,0.024,37.722,0.060,,,,,,,
f2,kfs,17.310,0.025,15.492,0.023,37.813,0.055,,,,,,,
f3,kfs,17.291,0.028,15.455,0.026,37.475,0.063,,,,,,,
f4,kfs,17.315,0.034,15.447,0.031,37.481,0.076,,,,,,,
f5,kfs,17.256,0.047,15.404,0.041,37.358,0.102,,,,,,,
"Sample 48126-1, Mt. Stinear (-73.050, 66.360)",,,,,,,,,,,,,,
"diorite gneiss, 2814",,,,,,,,,,,,,,
f1_1,kfs,17.844,0.069,15.529,0.061,38.572,0.154,,,,,,,
f4_1,kfs,17.873,0.068,15.515,0.060,38.462,0.150,,,,,,,
f3_1,kfs,17.881,0.076,15.543,0.066,38.594,0.168,,,,,,,
"Sample NRL215, Mt. Wilson (-73.709, 69.742)",,,,,,,,,,,,,,
"bt granodiorite, 518",,,,,,,,,,,,,,
f2,kfs,18.983,0.011,15.775,0.009,37.616,0.021,,,,,,,
f3,kfs,18.959,0.007,15.776,0.006,37.625,0.014,,,,,,,
f4,kfs,19.026,0.020,15.799,0.017,37.674,0.040,,,,,,,
fa,kfs,19.046,0.013,15.801,0.010,37.676,0.024,,,,,,,
fb,kfs,19.081,0.032,15.786,0.027,37.628,0.064,,,,,,,
"Sample 48168-6, Mt. Rubin (-73.450, 65.074)",,,,,,,,,,,,,,
"tonalite cobble, 3392",,,,,,,,,,,,,,
p1,pl,18.072,0.067,15.644,0.058,38.015,0.145,,,,,,,
p2,pl,18.123,0.098,15.663,0.085,38.087,0.210,,,,,,,
p2 rpt,pl,18.311,0.058,15.752,0.050,38.532,0.123,,,,,,,
pA,pl,18.161,0.029,15.716,0.025,38.225,0.063,,,,,,,
pB,pl,18.145,0.067,15.682,0.058,38.183,0.142,,,,,,,
,,,,,,,,,,,,,,
,,,,,,,,,,,,,,
"Sample location and descriptions are given in italics, abbreviations for mineralogy follow those outlined by Whitney & Evans (2010), text in inverted commas describe mapped units within the terrane and numbers indicate age, wither inferred or determined by U-Pb zircon geochronology where (m) indicates metamorphic age. ",,,,,,,,,,,,,,
"Replicate ablations (n = 120) of standard NIST 612 during the period of analysis yielded 206Pb/204Pb (�2s), 207Pb/204Pb (�2s) and 208Pb/204Pb (�2s) of 17.109 (0.005), 15.514 (0.004) and 36.990 (0.015).  ",,,,,,,,,,,,,,
"Ablations (n = 23) where the NIST 612 standard was treated as an unkown yielded 206Pb/204Pb (�2s), 207Pb/204Pb (�2s) and 208Pb/204Pb (�2s) of 17.099 (0.015), 15.505 (0.013) and 36.972 (0.030).  ",,,,,,,,,,,,,,
,,,,,,,,,,,,,,
,,,,,,,,,,,,,,
,,,,,,,,,,,,,,
,,,,,,,,,,,,,,
,,,,,,,,,,,,,,
,,,,,,,,,,,,,,
,,,,,,,,,,,,,,
"Whitney, D.L., Evans, B.W., 2010. Abbreviations for names of rock-forming minerals. American Mineralogist 95, 185-187.",,,,,,,,,,,,,,
